# Supplementary material for: Mapping the immune response to the outer domain of a human immunodeficiency virus-1 clade C gp120
Source: PubMed Central journal article supplement (PMC2885006; doi:10.1099/vir.0.2008/003491-0), 2008-10
Supplement: supp_89_10_2597__2.pdf [file supp_89_10_2597__2.pdf]

**Supplementary Table S1.** Properties of mAbs to CN54 OD that were isolated. mAbs are indicated as positive (+) and negative (–) for ELISA and Western blot.

| Competition group | mAb         | ELISA | Western blot | Isotype      |
|-------------------|-------------|-------|--------------|--------------|
| <b>1 (V3)</b>     | <b>2B7</b>  | +     | +            | <b>IgG1</b>  |
|                   | <b>4E5</b>  | +     | +            | <b>IgG1</b>  |
| <b>2</b>          | <b>4E1</b>  | +     | +            | <b>IgG1</b>  |
|                   | <b>3F9</b>  | +     | +            | <b>IgG1</b>  |
|                   | <b>1G12</b> | +     | +            | <b>IgG1</b>  |
|                   | <b>1H8</b>  | +     | +            | <b>IgG1</b>  |
| <b>3</b>          | <b>4D3</b>  | +     | –            | <b>IgG2a</b> |
| <b>4</b>          | <b>3F8</b>  | +     | –            | <b>IgG2a</b> |
